# Supplementary material
Source: MDPI journal article supplement (https://www.mdpi.com/2073-4344/12/6/664)
Supplement: s1 [file s1 › catalysts-1705805-supplementary.pdf]

## Supplementary Information

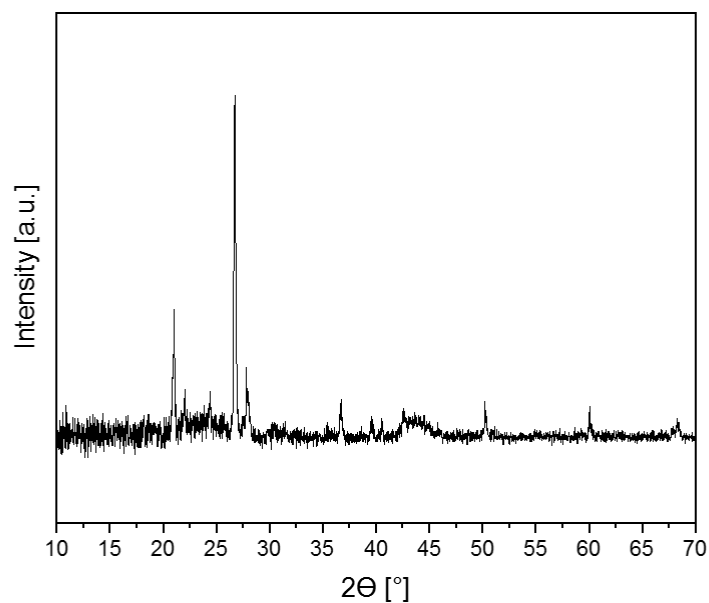

**Figure S1.** Powder XRD measurement of Ru/C.

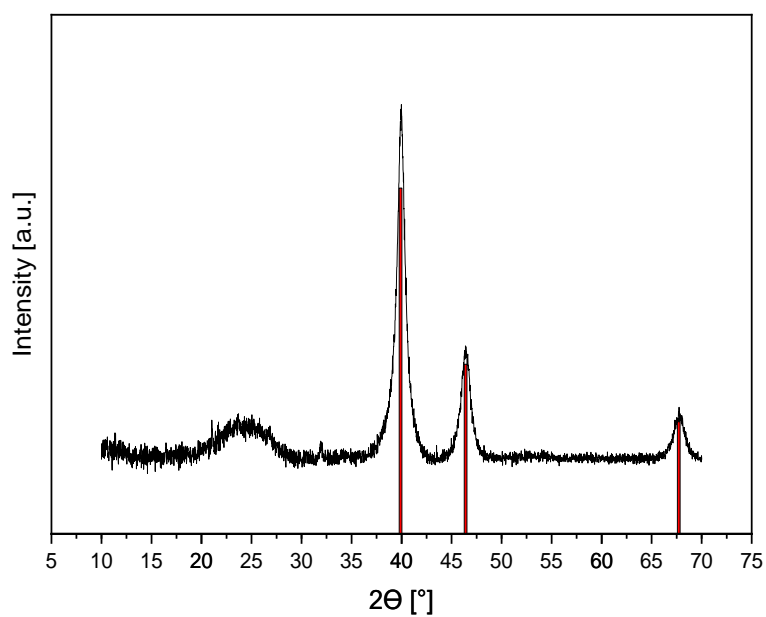

**Figure S2.** Powder XRD measurement of Pt/C. The red lines indicate the reflexes of cubic Pt as recorded in the Crystallography Open Database (record no. CDO 1011107).

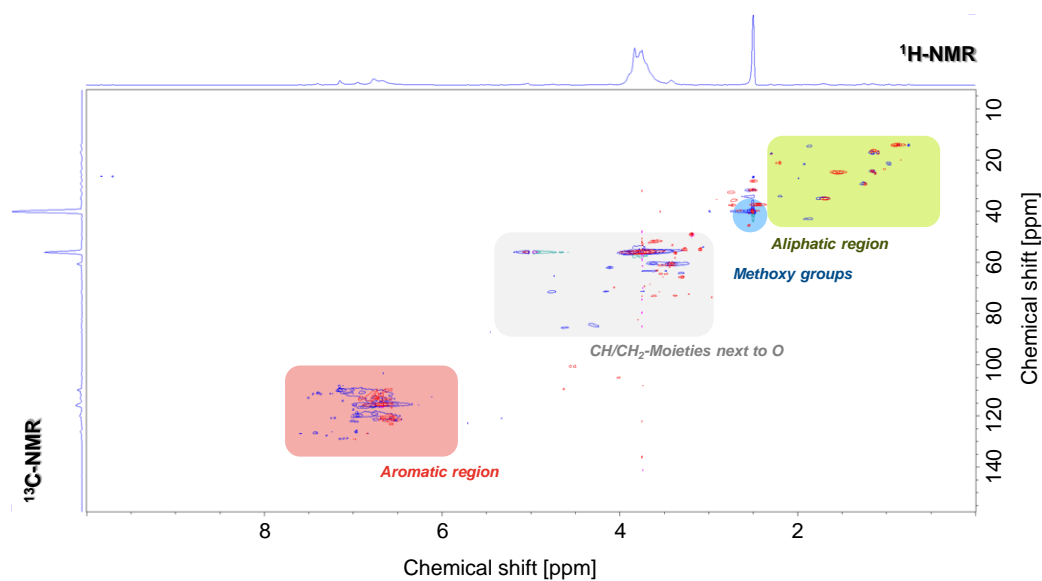

**Figure S3.** Overlay plot of the HSQC NMR-spectra of the parent Kraft-lignin (blue and green) and the lignin-oil (red and pink) obtained by the Pt/C catalyzed hydrogenolysis of Kraft-lignin in methanol at supercritical conditions (30 bar initial hydrogen pressure, 131 bar pressure at 250°C).

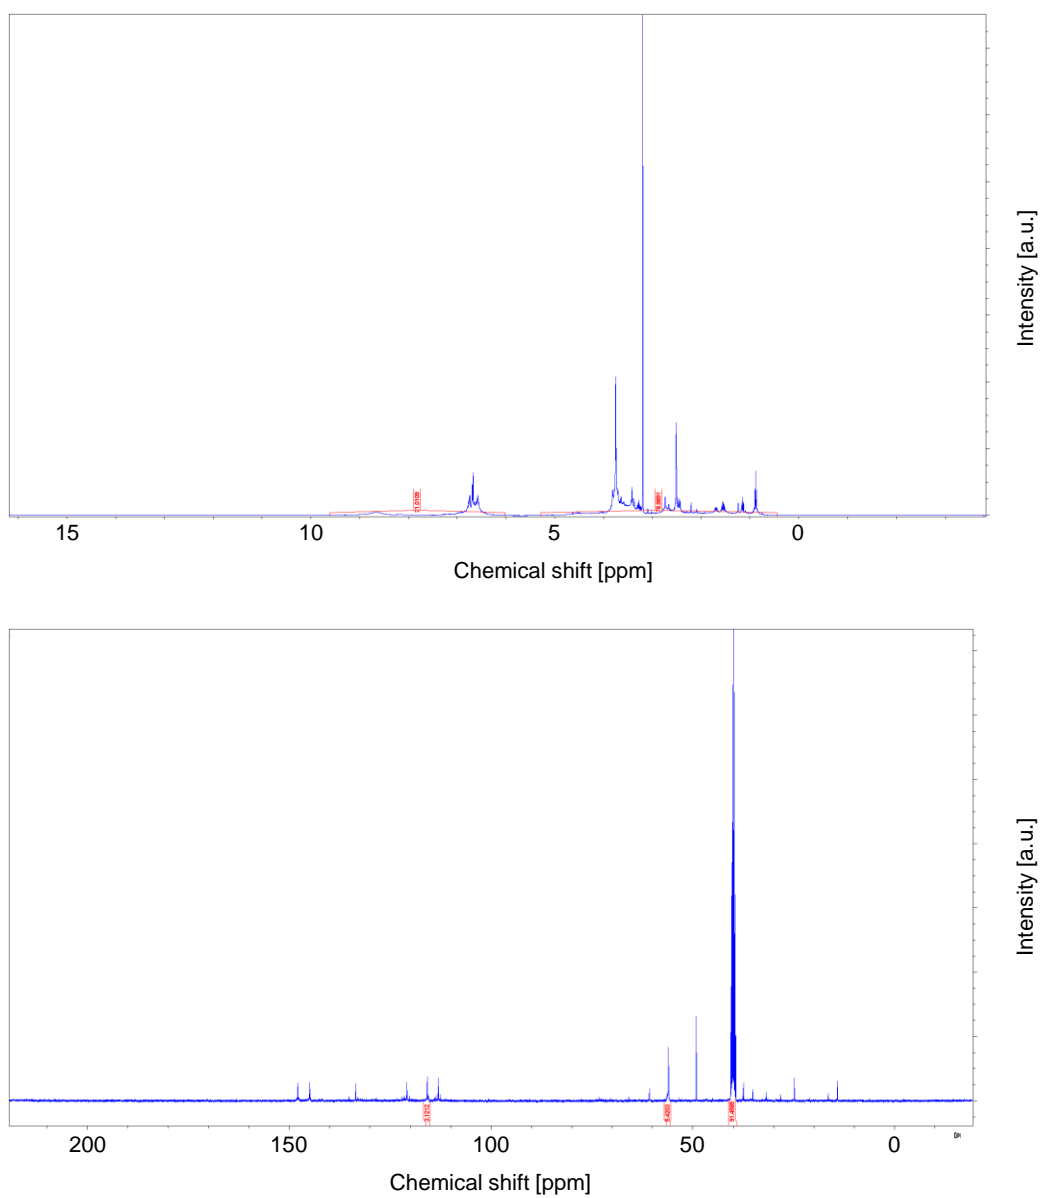

**Figure S4.**  $^1\text{H}$  and  $^{13}\text{C}\{^1\text{H}\}$  NMR spectrum of lignin-oil obtained by catalytic hydrogenolysis over Ru/C (top and bottom, respectively).

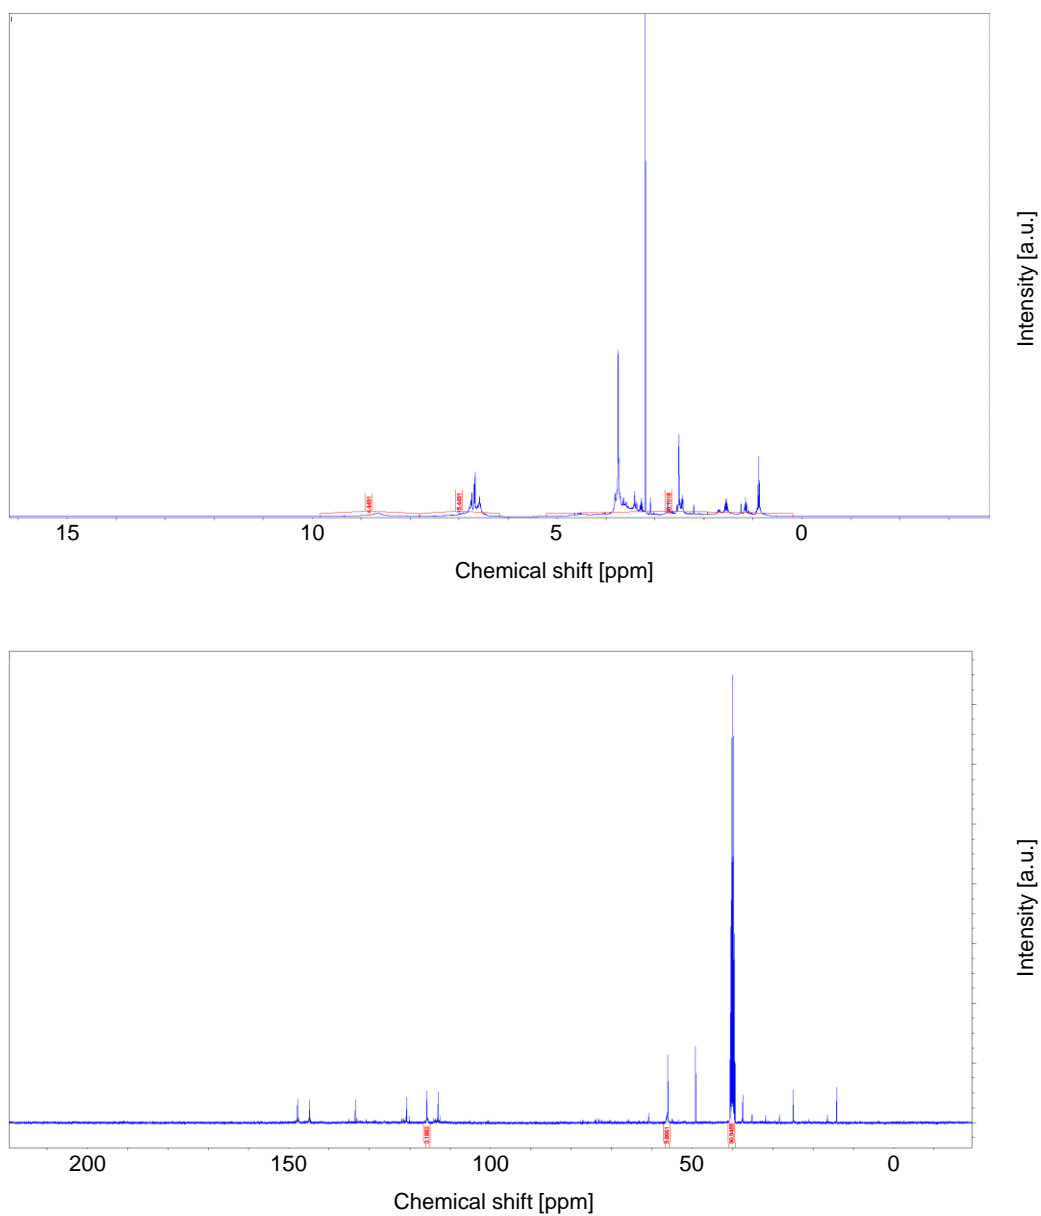

**Figure S5.**  $^1\text{H}$  and  $^{13}\text{C}\{^1\text{H}\}$  NMR spectrum of lignin-oil obtained by catalytic hydrogenolysis over Pt/C (top and bottom, respectively).
